# Supplementary material for: Stress, sense of coherence and quality of life among Norwegian nurse students after a period of clinical practice
Source: PeerJ. 2015 Sep 29;3:e1286. doi: 10.7717/peerj.1286 (PMC4592150; doi:10.7717/peerj.1286)
Supplement: Supplemental Information 1 [file peerj-03-1286-s001.xlsx]

## Sheet: Datafil (1).xls
Spørreskjema	birth	gender	marital status	children	full/part time	SOC	SOC1	SOC2	SOC3	SOC4	SOC5	SOC6	SOC7	SOC8	SOC9	SOC10	SOC11	SOC12	SOC13	QOLS	QOLS1	QOLS2	QOLS3	QOLS4	QOLS5	QOLS6	QOLS7	QOLS8	QOLS9	QOLS10	QOLS11	QOLS12	QOLS13	QOLS14	QOLS15	QOLS16	IES	PRACTICE	IES1	IES2	IES3	IES4	IES5	IES6	IES7	IES8	IES9	IES10	IES11
xx	1980	2	2	1	2		3	5	6	5	2	3	4	1	1	7	1	2	2		5	3	4	6	6	4	5	4	5	5	6	5	4	6	5	6		1	3	1	3	5	5	5	5	3	1	1	1
xx	1993	2	4	2	1		3	4	5	4	5	2	6	2	1	6	3	2	1		4	4	5	4	5	6	5	4	4	4	4	4	3	5	5	4		3	3	1	1	1	1	1	5	3	3	1	3
xx	1993	2	4	2	1		5	5	6	2	2	4	2	1	1	3	1	4	3		7	4	4	5	4	7	5	5	3	5	6	3	6	7	4	4		2	5	3	3	5	5	1	5	5	1	5	3
xx	1985	2	4	1	2		2	4	6	4	4	1	4	2	1	7	6	2	1		5	4	6	6	1	5	5	1	4	5	4	5	4	7	5	7		1	3	3	3	5	1	0	3	3	0	3	0
xx	1992	2	4	2	1		5	3	4	3	6	2	6	1	1	3	2	2	2		4	2	5	4	5	7	5	4	4	2	2	7	7	7	4	5		2	5	3	0	0	1	0	5	0	0	0	0
xx	1993	2	3	2	1		5	5	5	7	6	3	7	2	1	6	2	2	3		2	1	4	1	1	5	1	1	4	3	2	5	3	6	1	1		2	5	5	5	3	5	0	5	5	3	0	3
xx	1985	1	4	2	1		6	3	3	2	7	1	5	2	1	7	7	3	2		5	4	6	5	4	5	3	4	4	5	2	4	3	7	5	2		1	3	1	0	0	1	0	0	0	0	5	3
xx	1980	2	4	2	1		7	2	3	5	2	4	4	2	1	7	3	1	6		4	5	7	4	4	7	7	4	4	7	3	7	5	6	7	5		3	0	1	3	0	0	0	5	0	0	0	3
xx	1991	1	4	2	1		3	6	5	4	5	4	3	2	1	6	4	3	2		3	6	5	5	5	4	3	5	5	4	5	6	5	6	6	7		1	3	5	1	0	1	0	0	0	0	1	1
xx	1981	2	4	2	1		2	6	6	4	5	2	4	2	3	5	5	2	2		5	4	6	2	3	5	1	1	4	6	3	2	4	3	6	7		1	5	0	3	3	3	0	5	5	0	5	0
xx	1985	2	4	2	2		7	4	3	5	2	3	2	2	2	2	3	2	2		4	4	6	1	1	6	5	5	5	5	5	4	6	6	4	5		1	3	5	1	1	3	0	3	1	1	1	1
xx	1993	2	4	2	1		1	3	4	5	1	1	3	1	4	7	1	4	4		7	7	7	7	6	3	3	3	5	7	7	7	4	3	3	1		3	5	3	1	3	5	0	0	0	0	0	0
xx	1992	2	4	2	1		1	5	6	5	1	5	4	3	2	5	2	2	5		4	5	7	1	1	1	5	4	5	7	5	5	6	3	5	4		1	3	1	0	0	0	0	0	0	0	0	0
xx	1991	2	4	2	1		6	5	5	3	4	3	5	4	2	2	4	4	4		2	3	3	4	5	4	3	4	4	5	4	5	3	2	2	3		2	3	5	5	3	3	3	5	5	5	5	1
xx	1991	2	4	2	1		3	3	5	5	4	3	3	2	2	5	4	3	2		6	5	6	5	6	5	5	4	4	4	6	4	4	5	6	4		3	5	1	5	5	5	5	5	5	3	5	5
xx	1985	1	3	2	1		3	6	6	2	4	4	5	6	2	4	6	5	2		3	5	7	4	5	6	6	5	5	6	4	5	4	6	6	4		1	3	3	5	0	1	0	3	5	5	5	1
xx	1988	2	4	2	1		1	5	4	5	5	4	4	2	2	6	3	3	3		6	4	6	4	4	6	5	3	6	4	4	5	4	7	6	6		3	3	5	1	0	3	0	0	0	0	0	0
xx	1990	2	3	2	1		2	6	6	6	3	3	2	4	3	4	3	2	3		6	4	6	5	6	5	5	4	5	6	2	4	6	7	5	5		2	1	1	0	0	0	0	0	0	0	0	0
xx	1990	1	4	2	1		3	2	4	3	4	3	4	2	2	5	5	3	4		6	4	7	4	5	6	3	3	5	4	4	5	3	6	4	6		1	3	3	0	0	0	0	1	0	3	3	1
xx	1989	2	1	2	1		6	5	6	5	2	3	3	4	6	4	4	3	5		5	3	7	4	7	7	6	4	5	5	6	5	7	6	4	6		1	1	0	0	0	1	0	0	0	0	0	0
xx	1976	2	4	1	2		1	6	6	4	4	5	4	4	3	4	2	1	7		6	6	4	6	4	6	4	4	6	7	4	6	4	7	4	7		1	1	5	0	0	1	0	0	0	0	0	0
xx	1984	2	1	2	1		7	5	5	4	4	3	4	4	3	4	6	5	5		4	6	6	5	6	4	5	5	5	4	4	4	4	6	5	6		3	3	3	0	1	1	1	3	3	5	1	1
xx	1984	2	4	2	2		6	2	3	6	2	3	5	2	4	2	3	5	2		4	4	6	5	5	6	4	2	6	5	5	5	5	5	4	6		1	3	3	1	5	3	0	1	3	1	1	3
xx	1988	2	4	2	1		3	2	3	3	3	4	4	2	2	3	3	4	3		5	3	6	4	4	7	5	3	6	5	4	5	6	7	4	5		3	0	3	0	0	0	0	1	0	0	0	0
xx	1992	2	2	2	1		4	3	3	4	5	3	3	4	3	6	2	3	4		5	2	3	4	6	5	3	3	4	3	4	5	2	5	2	5		2	5	1	3	5	5	5	3	1	3	3	1
xx	1992	2	1	2	1		2	3	3	5	2	2	5	3	3	3	3	2	5		4	3	3	3	3	2	3	3	4	3	4	2	3	2	4	2		3	3	1	3	3	3	1	1	1	3	1	1
xx	1991	2	4	2	1		2	5	3	2	5	3	4	3	3	5	3	5	5		5	4	5	1	1	5	6	5	5	5	4	3	5	5	4	6		1	3	1	1	0	1	1	0	1	1	1	0
xx	1992	2	4	2	1		4	5	5	4	5	4	3	4	2	5	3	5	5		5	4	6	5	5	6	7	3	4	5	6	6	6	6	6	6		2	3	3	5	1	1	0	0	3	0	0	0
xx	1992	2	2	2	1		2	4	4	4	3	3	4	3	2	5	3	5	6		7	3	5	6	7	5	6	6	6	5	4	3	6	6	3	5		3	5	1	5	5	5	1	3	5	3	5	5
xx	1992	2	2	2	1		5	5	4	4	4	2	3	3	4	4	4	5	5		5	4	5	1	6	7	5	4	4	4	3	3	4	5	4	5		3	5	3	1	1	1	3	3	3	5	3	5
xx	1993	2	4	2	1		4	4	5	4	3	4	4	5	2	4	4	3	6		5	4	5	5	5	5	5	5	4	4	4	5	5	5	5	6		3	1	3	3	0	1	0	0	0	0	0	0
xx	1989	2	3	2	1		2	3	2	5	7	3	4	3	2	6	3	3	2		6	4	7	6	6	6	5	5	5	4	6	6	6	6	6	6		2	3	3	5	1	3	0	3	3	1	5	1
xx	1993	2	3	2	1		4	5	5	5	5	5	3	4	2	5	3	4	5		5	4	7	7	7	5	5	4	6	4	6	5	4	5	6	6		2	3	3	3	3	3	1	5	3	0	0	0
xx	1993	2	3	2	1		3	3	5	5	2	3	3	6	4	5	4	2	4		5	3	4	1	5	3	3	3	4	4	5	4	4	5	3	4		3	1	3	3	0	3	0	0	0	0	3	1
xx	1959	1	3	1	1		3	5	6	4	5	2	3	4	3	3	6	3	5		5	6	5	5	6	5	5	4	6	7	4	4	6	4	4	5		2	3	1	1	1	3	1	5	3	1	5	1
xx	1970	2	1	1	2		4	5	5	5	4	4	5	4	4	5	4	6	5		4	4	6	5	4	4	5	4	5	5	4	4	4	4	4	3		1	3	3	3	0	3	0	3	5	1	0	0
xx	1974	2	1	1	1		6	4	4	5	3	4	4	4	4	4	5	3	6		5	4	4	5	4	5	5	3	6	6	5	3	4	3	3	3		3	1	3	5	5	3	1	1	3	3	3	1
xx	1988	2	3	2	1		2	4	5	5	6	3	3	6	1	7	4	3	5		6	2	7	1	7	7	6	2	4	6	4	4	5	5	3	4		1	3	3	0	0	3	0	1	0	0	0	0
xx	1989	2	4	2	2		5	4	6	5	5	5	4	3	4	5	4	4	6		7	3	5	1	1	5	6	6	4	4	6	6	4	6	3	6		2	3	3	3	3	1	0	3	3	3	3	3
xx	1991	2	4	2	1		2	4	2	4	7	2	4	2	2	5	4	5	3		5	5	4	6	6	7	6	6	4	4	5	6	7	6	7	6		2	3	1	1	0	1	0	5	1	1	0	1
xx	1991	2	4	2	1		4	5	5	4	5	6	4	3	4	5	5	3	5		5	5	6	5	6	5	6	4	5	6	6	7	4	7	3	5		3	3	5	5	1	0	1	0	3	0	0	0
xx	1991	2	1	2	1		2	4	6	6	4	4	2	3	2	4	4	3	4		7	4	6	1	7	7	6	4	5	6	6	6	7	7	7	7		2	3	1	1	1	3	3	0	0	0	1	0
xx	1992	2	3	2	1		3	4	4	3	5	3	3	2	4	3	4	4	4		3	5	3	5	7	7	5	4	4	5	5	6	6	6	6	5		1	1	1	0	0	0	0	1	1	3	0	1
xx	1970	2	1	1	2		1	6	5	5	2	3	4	6	4	5	3	5	6		1	2	4	6	6	5	5	2	7	6	6	2	1	3	2	2		1	5	3	5	3	3	3	3	1	1	3	1
xx	1976	2	1	1	2		2	7	7	6	3	2	3	4	5	5	5	6	6		4	5	4	7	7	1	4	3	7	7	6	1	4	1	2	7		1	3	3	3	0	1	0	0	0	0	0	0
xx	1985	2	4	2	1		3	5	5	3	6	4	4	4	3	3	4	4	5		5	4	5	5	5	5	5	5	5	4	4	5	6	5	4	5		3	5	3	5	5	3	1	3	5	5	3	3
xx	1990	2	4	2	1		2	4	4	5	2	3	3	3	3	4	4	5	5		4	4	5	3	3	5	6	4	5	5	5	6	6	6	5	5		2	5	3	3	5	1	1	1	3	3	0	0
xx	1990	2	4	1	1		3	3	4	4	3	3	4	5	5	4	4	4	3		6	5	4	4	4	4	5	4	6	6	5	3	3	4	4	4		1	3	3	1	1	1	3	3	5	5	3	3
xx	1991	2	4	2	1		2	3	3	4	5	2	6	5	3	4	4	2	6		6	5	7	4	4	7	5	4	4	6	4	4	6	6	4	6		3	3	3	3	1	1	1	3	0	0	0	0
xx	1992	2	3	2	1		3	4	4	6	4	4	5	5	3	5	3	5	4		6	5	7	5	6	6	4	4	5	5	5	3	6	5	6	4		2	3	1	1	0	0	0	0	0	1	0	0
xx	1993	2	4	2	1		1	3	2	3	4	3	3	3	3	4	4	3	3		6	6	4	1	1	7	6	6	5	5	5	5	7	7	7	7		2	5	1	5	3	5	1	3	3	0	3	3
xx	1993	2	3	2	1		2	6	6	5	2	4	3	5	3	4	4	5	6		4	4	6	4	5	6	5	4	5	4	5	5	6	5	5	4		1	5	3	1	0	1	0	3	0	0	0	0
xx	1994	2	3	2	1		6	4	5	6	7	4	3	1	1	4	4	5	7		5	4	7	1	6	5	5	3	4	6	6	5	4	6	5	6		1	0	0	0	0	0	0	0	0	0	0	0
xx	1990	1	4	2	1		6	3	3	5	5	5	3	5	3	6	4	3	5		3	3	4	7	6	5	5	5	5	5	5	5	5	5	5	5		3	5	3	0	0	3	0	0	0	0	0	0
xx	1967	2	2	1	2		3	4	4	4	4	5	4	5	3	5	4	5	4		5	5	5	4	4	5	5	5	5	4	4	4	4	4	4	4		1	3	3	3	0	1	0	1	1	3	1	1
xx	1982	2	1	1	1		7	5	3	7	4	5	5	3	3	4	5	5	6		3	4	6	6	6	6	4	3	5	5	4	4	4	5	4	5		3	3	5	3	1	3	3	3	5	3	1	3
xx	1989	2	2	2	1		4	4	4	5	6	4	3	1	5	5	4	4	5		5	5	5	5	5	5	5	5	5	5	5	4	4	4	5	4		2	5	3	3	1	0	0	1	1	3	3	3
xx	1991	2	3	2	1		2	4	5	4	2	5	2	4	4	5	4	5	4		6	4	5	4	4	5	4	5	5	4	4	4	4	5	5	4		2	3	1	1	3	3	3	3	1	1	1	3
xx	1992	2	2	2	1		6	2	3	4	6	2	4	5	3	3	4	3	5		6	4	6	6	6	5	5	4	4	6	4	5	4	5	4	5		2	3	3	5	3	3	1	1	3	0	1	1
xx	1992	2	4	2	1		2	4	3	4	6	3	3	4	2	2	4	2	3		7	4	7	5	5	7	4	4	5	5	5	4	6	6	5	5		2	1	3	3	3	5	3	1	1	3	3	1
xx	1994	1	4	2	1		6	5	5	6	4	5	3	4	5	3	3	5	5		6	6	6	6	6	6	5	5	5	5	5	6	6	6	7	5		1	0	0	0	1	0	0	0	1	0	5	1
xx	1968	2	1	1	2		2	4	4	5	4	5	4	4	4	5	4	4	4		5	4	5	6	4	6	6	5	6	6	6	4	4	5	4	6		1	5	3	3	1	3	1	3	3	3	3	3
xx	1982	2	4	1	1		6	5	2	6	4	6	3	4	5	2	4	3	1		5	7	7	7	1	6	7	4	5	4	6	4	7	5	5	6		3	1	1	3	5	5	5	5	3	3	3	1
xx	1989	2	3	2	1		1	4	4	4	5	4	4	4	3	6	5	5	4		3	6	5	5	5	6	5	5	4	5	5	5	6	6	7	7		2	5	3	3	1	0	0	1	0	0	0	0
xx	1990	2	2	1	1		2	3	4	1	4	3	3	3	4	3	4	5	6		7	4	7	4	7	7	2	1	4	5	5	5	6	7	5	6		3	0	0	0	0	0	0	0	0	0	0	0
xx	1990	2	4	2	1		2	5	5	6	2	4	4	6	4	6	4	5	6		7	5	7	4	5	6	6	5	5	5	5	7	5	5	5	6		1	5	1	5	5	5	3	5	3	5	5	5
xx	1992	2	4	2	1		3	4	3	4	6	5	4	3	4	5	6	3	3		6	6	5	4	4	4	4	4	5	4	5	5	5	6	6	6		2	5	3	1	1	3	0	3	1	0	0	0
xx	1992	2	3	2	1		1	5	4	5	4	4	3	3	2	3	4	6	3		4	5	5	1	5	7	6	6	5	4	5	5	7	7	6	3		2	3	5	3	3	3	1	5	1	1	0	0
xx	1992	2	4	2	1		3	2	4	4	6	3	2	3	4	6	2	4	6		6	4	6	7	5	6	6	3	5	6	6	6	6	6	4	4		1	3	1	3	0	0	0	1	0	0	0	0
xx	1968	2	4	1	2		4	6	6	5	4	5	4	5	4	4	6	5	6		5	4	5	7	1	5	4	4	7	7	6	4	4	5	4	4		1	3	3	1	0	5	3	5	1	1	1	0
xx	1986	2	2	1	2		1	4	4	7	5	4	4	5	1	7	4	4	7		4	4	6	7	4	5	5	7	7	7	5	5	4	7	4	4		2	5	3	5	3	5	1	3	0	0	5	0
xx	1989	2	4	2	1		4	5	5	5	5	3	4	5	6	4	4	5	6		5	5	1	4	4	4	4	3	3	7	4	1	3	5	4	6		1	0	0	0	0	0	0	0	0	0	0	0
xx	1993	2	4	2	1		3	4	4	5	5	3	4	3	3	3	6	4	6		7	5	7	6	5	6	5	5	6	6	5	6	6	5	5	4		2	3	3	5	1	3	1	0	3	1	5	1
xx	1976	1	2	2	1		3	2	3	5	3	5	3	5	2	3	3	6	3		6	5	6	6	4	5	5	5	5	6	5	4	4	6	6	7		2	3	5	0	0	0	0	0	0	0	0	0
xx	1981	1	1	1	1		2	4	4	4	5	5	3	4	2	5	6	5	5		5	4	5	6	5	6	4	4	4	5	3	6	4	6	2	7		2	1	1	0	0	0	0	3	0	0	0	0
xx	1982	1	2	1	2		4	2	3	6	5	5	6	5	3	1	3	4	3		5	2	5	5	6	2	6	6	6	6	6	5	2	6	2	6		1	3	3	5	1	3	1	3	1	1	5	5
xx	1992	1	4	2	1		3	4	4	4	6	5	4	4	3	3	3	5	6		2	5	6	1	5	5	5	5	4	5	5	4	5	6	6	6		1	1	5	3	0	0	0	3	0	0	3	0
xx	1971	2	1	1	2		1	4	5	4	5	6	4	4	6	6	5	4	4		6	6	5	5	6	4	5	5	4	5	5	4	4	5	4	4		1	3	1	3	3	3	3	3	1	1	1	1
xx	1980	2	4	1	2		2	5	4	5	6	6	5	4	2	5	5	5	6		4	5	5	6	2	5	6	3	6	5	5	2	4	5	5	4		1	1	5	0	0	1	0	1	0	0	0	0
xx	1984	2	1	2	2		1	4	2	5	2	3	2	3	5	4	4	4	5		5	7	7	6	4	6	5	4	7	5	5	6	4	7	5	5		1	3	1	5	0	1	0	3	1	0	5	3
xx	1988	2	2	2	1		3	3	5	5	5	5	3	4	3	5	4	5	6		5	4	6	5	6	6	5	1	6	5	5	5	6	6	4	4		3	5	3	3	5	5	5	3	3	3	5	1
xx	1988	2	2	2	1		1	5	5	5	6	4	3	5	4	4	3	5	4		6	5	7	5	7	6	5	4	5	5	6	6	5	6	6	7		1	3	3	0	0	1	0	0	0	0	0	0
xx	1990	2	3	2	1		2	4	3	4	3	5	3	4	4	3	5	3	5		4	4	4	7	6	4	5	4	4	4	4	2	4	4	4	4		3	5	3	0	1	3	3	3	1	1	1	1
xx	1991	1	4	2	1		4	6	6	6	6	6	4	6	3	1	7	3	3		5	5	5	4	4	6	6	7	5	4	4	7	6	7	5	5		2	3	5	0	0	1	0	0	0	0	0	0
xx	1953	2	1	1	2		1	3	4	4	4	5	2	3	3	5	5	6	4		5	5	6	6	4	6	6	5	6	5	6	4	5	6	5	5		1	5	3	3	3	3	1	3	3	3	3	3
xx	1956	2	1	1	2		4	4	4	7	4	4	2	4	4	4	4	4	6		7	7	5	7	7	6	5	4	6	6	6	6	6	6	7	6		1	5	5	3	3	5	5	5	3	1	1	1
xx	1964	2	1	1	1		1	4	3	6	5	4	4	4	4	4	4	4	4		6	5	5	7	7	6	5	1	5	6	5	3	6	5	5	6		3	1	5	5	0	0	0	3	1	1	0	0
xx	1979	2	1	1	1		1	3	5	6	5	6	3	2	2	3	5	5	3		6	4	4	7	5	5	6	6	7	7	6	6	5	6	5	6		3	3	5	3	5	5	3	3	3	1	3	1
xx	1981	2	2	1	2		4	4	4	7	4	5	2	2	2	3	3	6	7		6	4	5	7	4	4	5	5	4	4	4	5	4	7	6	7		1	5	5	5	0	0	0	0	5	5	5	1
xx	1989	2	3	2	1		2	4	2	4	6	4	2	3	3	5	4	6	4		6	6	5	6	5	5	6	4	5	3	6	2	5	3	7	6		1	3	3	1	0	0	0	1	1	1	1	1
xx	1991	2	2	2	1		3	5	4	4	6	2	2	4	6	4	7	6	2		3	4	6	4	7	7	5	3	4	7	5	3	2	6	2	4		2	5	3	5	1	5	5	3	3	0	3	0
xx	1993	2	4	2	1		4	5	3	5	4	2	3	6	4	2	5	4	6		5	5	7	1	1	7	5	3	5	4	5	4	7	5	6	6		1	1	0	0	0	0	0	0	0	0	0	0
xx	1994	2	3	2	1		1	5	6	6	7	5	1	6	2	5	4	4	3		6	6	7	1	1	5	4	1	6	4	5	5	7	7	7	6		1	1	1	0	0	0	0	0	0	0	0	0
xx	1975	2	1	1	2		3	6	5	7	6	5	4	6	6	5	4	4	5		7	5	6	7	7	4	5	4	6	6	7	4	5	7	6	6		1	3	1	3	0	3	0	5	3	0	3	0
xx	1989	2	2	2	1		1	3	4	5	5	3	3	5	4	5	2	6	6		5	5	7	4	7	7	5	5	5	6	6	6	6	6	5	6		3	3	1	1	1	3	3	3	1	1	3	1
xx	1989	2	1	2	1		1	2	2	4	3	3	2	3	2	3	6	6	3		5	3	5	4	5	5	5	4	6	5	5	4	4	4	4	5		2	3	3	3	3	3	1	3	3	3	3	3
xx	1990	2	4	2	1		1	4	4	5	4	4	3	5	6	3	4	4	3		4	4	4	4	4	5	5	3	5	6	6	1	5	4	4	6		3	1	1	0	0	1	0	1	1	1	0	0
xx	1991	2	4	2	1		2	4	4	4	5	5	2	4	5	2	5	3	3		6	5	7	6	6	6	5	5	5	6	6	4	6	6	5	6		2	3	5	3	0	3	0	1	0	0	0	0
xx	1992	2	2	2	1		2	4	3	6	4	4	3	4	4	4	4	4	6		6	5	6	6	6	6	4	4	6	5	6	5	5	6	6	6		3	1	1	0	0	1	0	0	0	0	0	0
xx	1993	2	2	2	1		2	5	5	6	5	6	6	4	5	5	6	6	5		6	5	6	5	7	6	5	5	6	6	6	6	7	6	7	6		3	5	1	3	3	3	5	5	5	1	5	1
xx	1993	2	2	2	1		3	4	3	5	6	5	2	4	2	4	4	5	5		6	2	7	1	7	6	5	6	4	4	3	5	3	4	3	4		3	1	3	3	0	1	0	0	0	0	1	3
xx	1993	2	4	2	1		1	3	2	5	3	5	5	3	4	6	5	6	6		7	6	7	7	7	7	7	4	4	3	5	1	7	7	7	4		3	5	1	3	5	1	5	3	3	3	3	0
xx	1982	2	1	1	2		1	6	6	5	6	5	4	5	5	5	6	5	6		6	4	4	5	4	5	6	6	6	6	5	4	6	6	5	3		1	3	3	0	0	1	0	3	0	0	0	0
xx	1990	2	4	2	1		3	2	3	5	6	6	4	5	3	2	2	4	4		6	4	6	4	6	6	4	1	5	6	6	3	6	5	5	7		2	1	0	0	0	3	0	3	1	0	0	1
xx	1991	2	4	2	1		2	3	4	3	5	5	2	3	4	4	5	6	5		4	5	6	4	5	6	4	4	5	5	5	4	6	6	6	5		1	1	5	0	0	0	0	0	0	0	0	0
xx	1992	2	2	2	1		6	6	7	6	6	5	3	6	6	3	5	5	7		6	6	7	5	7	7	4	4	5	6	6	2	6	5	6	5		2	3	3	3	0	3	0	0	1	0	0	0
xx	1992	2	4	2	1		1	3	4	5	5	4	4	5	3	4	5	5	5		6	6	6	6	6	6	7	5	4	6	6	6	6	5	6	6		3	3	3	3	1	3	0	3	5	1	5	0
xx	1993	2	2	2	1		2	5	4	6	7	4	4	4	4	4	4	4	7		7	4	7	5	7	7	4	4	6	4	6	4	7	4	4	6		3	3	5	5	0	0	0	0	1	3	5	1
xx	1993	2	4	2	1		6	3	6	5	6	5	3	6	4	3	5	5	6		6	5	6	6	5	6	5	5	5	5	6	5	6	6	6	6		1	3	1	1	0	0	0	1	1	1	0	1
xx	1994	2	4	2	1		2	4	4	5	6	5	3	5	3	5	4	5	6		3	5	7	4	7	7	6	1	4	5	4	4	5	5	5	5		1	5	1	5	5	3	0	5	5	5	3	3
xx	1991	1	4	2	1		4	2	2	6	6	5	4	6	2	5	5	4	5		7	6	6	6	6	7	6	5	6	5	5	6	7	7	7	7		1	0	5	0	0	0	0	0	0	0	0	0
xx	1976	2	1	1	2		3	3	3	4	7	3	3	3	3	3	5	6	6		6	4	4	7	7	7	4	1	5	5	5	5	5	5	4	6		2	5	1	5	1	3	3	3	1	1	0	0
xx	1990	2	3	2	1		2	2	1	6	4	4	3	5	3	5	5	5	3		5	6	5	4	6	7	6	6	5	4	5	7	6	7	7	6		1	5	3	3	0	1	0	3	0	3	0	0
xx	1993	2	4	2	1		1	6	4	6	2	3	2	6	4	3	5	7	5		7	5	7	6	6	7	4	4	6	6	6	4	7	7	7	7		3	3	3	0	0	0	0	3	0	0	0	0
xx	1984	1	2	2	1		2	2	4	6	1	5	1	3	6	5	4	6	6		5	4	7	4	4	4	4	3	5	5	4	5	3	4	5	6		3	5	5	5	5	5	3	5	1	3	5	1
xx	1988	1	3	2	1		7	5	2	6	2	4	2	6	6	2	5	6	6		6	5	7	7	6	6	7	6	6	6	6	7	7	7	5	7		3	1	5	0	0	0	0	0	0	0	0	0
xx	1957	2	4	1	2		7	5	4	7	6	6	1	3	4	4	6	6	6		5	6	7	6	5	7	6	6	6	7	7	7	7	7	7	7		1	0	0	0	0	3	0	0	0	0	0	0
xx	1977	2	2	1	2		1	5	5	6	4	2	1	6	7	6	5	6	5		5	6	6	7	5	6	5	4	4	4	6	5	5	5	6	6		1	1	3	1	0	0	0	0	1	1	1	1
xx	1981	2	1	1	2		1	4	4	7	3	4	4	6	5	4	4	6	5		5	3	5	6	7	6	4	4	6	5	4	4	5	5	4	4		1	3	3	5	0	0	0	0	0	0	0	0
xx	1983	2	1	1	2		1	4	4	6	4	5	2	3	5	4	3	6	6		6	4	7	7	7	7	6	5	6	4	6	4	6	5	5	4		1	5	3	3	3	0	0	1	5	5	1	5
xx	1989	2	4	2	1		2	2	3	5	5	5	3	6	4	2	2	4	4		7	5	7	7	7	7	5	5	5	4	6	6	5	5	5	5		2	3	3	3	0	0	0	3	1	0	0	0
xx	1992	2	2	2	1		3	3	3	4	6	5	4	6	4	4	5	4	6		6	4	5	4	4	5	4	4	5	5	5	5	5	5	5	5		2	1	3	1	3	3	3	1	5	5	3	3
xx	1994	2	4	2	1		2	4	3	5	5	4	2	5	5	3	3	5	5		6	6	6	6	6	6	6	6	6	6	6	6	6	6	6	6		1	1	1	1	1	0	0	1	0	0	1	0
xx	1992	1	2	2	1		2	3	3	6	2	4	3	5	6	4	4	5	7		7	5	5	5	6	6	6	5	6	5	5	5	5	6	6	6		3	0	1	1	0	1	0	1	0	0	0	0
xx	1973	2	4	1	2		3	1	3	4	4	4	3	5	6	2	4	4	5		5	4	6	6	4	6	5	4	6	6	5	6	6	6	5	6		1	5	1	1	0	0	0	3	1	1	0	0
xx	1983	2	4	2	2		2	3	3	5	6	5	4	5	6	4	5	3	5		5	4	5	4	4	5	5	5	5	4	5	4	5	5	4	5		1	3	3	0	0	1	0	1	0	0	0	1
xx	1987	2	4	2	1		2	5	4	6	2	3	1	6	6	4	5	6	6		6	6	7	4	4	7	7	7	6	7	7	6	5	7	7	7		1	3	3	3	1	5	0	5	5	0	1	0
xx	1991	2	2	2	1		3	2	3	3	6	4	3	6	5	4	6	4	5		5	6	6	5	6	6	4	2	4	4	4	3	5	5	6	6		2	3	3	1	3	3	5	3	5	3	3	3
xx	1992	2	2	2	1		1	4	3	5	6	3	3	5	4	4	3	7	6		7	5	4	4	5	7	6	5	6	6	5	7	7	7	7	7		3	3	5	0	0	0	0	0	0	3	3	3
xx	1992	2	4	2	1		2	4	3	5	6	5	4	5	4	3	4	5	6		4	4	7	5	5	6	5	4	5	5	5	5	4	5	5	5		1	3	1	1	0	0	0	3	3	0	0	0
xx	1993	2	3	2	1		2	5	2	4	6	6	2	2	4	2	3	6	6		7	5	7	7	7	7	6	4	6	4	4	5	7	6	7	7		3	5	1	3	3	3	0	3	3	0	1	0
xx	1993	2	4	2	1		3	6	5	6	6	4	3	3	6	3	6	6	7		7	4	7	7	7	7	6	6	4	4	5	4	5	6	4	4		2	5	3	3	3	1	1	3	1	3	3	5
xx	1993	2	2	2	1		2	2	2	5	6	4	3	5	5	4	4	3	5		5	5	7	4	7	6	4	4	6	4	5	5	6	6	6	6		2	1	1	0	0	0	0	1	1	0	1	0
xx	1993	2	4	2	1		2	3	3	5	6	5	2	5	3	4	4	5	5		5	6	6	4	4	5	6	5	5	4	4	5	4	5	5	4		1	1	5	0	0	0	0	0	0	0	0	0
xx	1993	2	4	2	1		2	3	4	5	6	5	3	4	3	3	5	5	6		7	4	5	7	7	7	5	5	6	5	4	7	7	7	5	4		1	5	5	5	5	5	0	1	0	0	1	0
xx	1993	2	4	2	1		2	5	3	6	4	3	2	5	6	2	3	6	5		6	6	5	4	5	7	6	6	6	7	6	5	6	6	6	7		1	3	3	3	0	0	0	1	5	1	3	1
xx	1994	2	3	1	1		2	3	5	5	3	5	1	7	4	4	6	2	7		7	6	7	4	7	7	7	4	5	5	7	5	7	7	6	7		1	3	3	5	0	1	0	3	3	0	5	3
xx	1979	2	2	2	2		2	5	5	5	4	5	2	5	5	3	6	6	6		5	5	7	5	7	7	6	4	6	6	6	5	6	6	5	5		1	5	1	3	0	1	0	3	3	0	0	0
xx	1992	2	2	2	1		1	2	3	5	6	3	3	4	4	4	5	5	6		7	5	7	5	7	7	6	6	5	6	6	5	6	6	5	6		3	3	1	3	3	3	3	1	1	0	0	0
xx	1992	2	4	2	1		3	3	2	5	4	4	4	5	6	2	4	5	6		6	4	6	5	5	6	5	4	5	5	5	4	6	6	6	5		3	1	0	1	0	0	0	0	1	3	3	3
xx	1992	2	4	2	1		2	2	2	4	5	5	4	4	4	3	5	5	6		7	4	5	5	5	6	5	5	5	5	5	5	6	6	6	6		3	3	3	3	1	3	1	3	3	3	3	1
xx	1993	2	3	2	1		2	3	4	5	6	5	2	6	6	6	4	4	6		6	6	6	6	7	6	6	2	6	6	6	3	6	6	3	6		3	0	5	1	0	0	0	1	0	1	0	0
xx	1993	2	4	2	1		2	3	4	5	6	4	2	5	5	4	3	6	6		6	6	7	7	7	7	6	6	5	6	7	7	7	6	7	6		1	1	0	0	0	0	0	0	0	0	0	0
xx	1983	2	2	1	2		2	4	4	4	6	6	4	5	6	2	4	5	6		6	4	5	6	6	5	4	4	5	5	4	4	4	3	4	4		1	3	3	1	1	1	1	3	1	0	1	1
xx	1989	2	4	2	1		2	4	5	7	6	4	1	5	4	3	5	5	5		4	5	6	5	4	7	5	6	4	5	6	6	6	6	5	7		2	0	0	0	0	0	0	0	0	0	0	0
xx	1991	2	3	2	1		1	2	3	6	5	3	3	5	3	3	5	5	6		5	6	5	3	5	5	6	4	5	5	5	4	5	5	6	6		2	1	1	1	0	0	0	1	0	0	0	0
xx	1986	1	2	2	1		2	4	4	5	4	5	3	6	6	2	4	5	7		5	6	6	4	6	7	3	4	5	5	6	5	5	5	6	6		3	0	1	0	0	0	0	0	0	0	0	0
xx	1984	2	2	2	1		2	4	3	4	6	4	3	6	5	2	4	7	5		7	6	7	1	6	6	6	5	6	7	5	6	6	6	6	6		2	5	1	1	0	3	1	3	3	1	1	1
xx	1986	2	4	2	1		2	5	5	3	6	5	2	7	6	3	5	6	6		7	6	5	7	7	7	4	5	6	6	6	6	7	7	7	7		2	5	1	0	1	1	0	3	0	0	0	0
xx	1988	2	2	2	1		2	5	3	6	6	5	4	5	5	2	5	5	6		6	5	5	5	7	7	6	4	5	5	5	4	7	5	5	5		2	1	1	0	0	0	0	1	1	0	0	0
xx	1988	2	2	1	2		1	3	3	7	6	5	4	4	4	2	4	6	4		4	4	6	7	4	5	6	4	5	5	5	5	4	5	5	5		1	3	0	0	0	0	0	0	0	0	0	0
xx	1993	2	4	2	1		2	2	2	4	7	5	2	4	4	4	4	6	5		6	5	5	5	5	7	5	5	6	4	5	6	5	6	6	5		2	1	5	0	0	0	0	0	0	0	0	0
xx	1994	2	3	2	1		2	3	3	6	6	5	3	6	6	5	4	4	6		6	4	6	5	6	6	4	4	6	5	5	4	5	5	4	6		1	1	5	1	0	0	0	0	0	0	0	0
xx	1983	1	4	2	2		3	5	3	6	6	5	2	6	7	6	5	6	6		4	3	7	6	6	7	5	4	5	6	2	7	5	6	3	4		1	3	3	2	0	0	0	1	0	0	0	0
xx	1991	1	2	2	1		1	3	2	6	5	6	3	4	3	5	5	6	7		5	5	6	6	6	6	6	6	6	7	7	5	6	7	7	7		3	1	5	5	0	0	0	0	0	0	3	0
xx	1994	1	4	2	1		5	2	2	5	1	1	2	7	7	1	6	6	7		7	6	7	6	6	7	4	4	6	6	6	6	7	6	7	6		1	3	0	0	0	0	0	3	0	0	0	0
xx	1962	2	1	1	2		2	5	5	5	6	6	3	6	4	2	6	6	6		6	6	6	6	7	6	5	4	6	6	6	4	5	6	6	5		1	3	5	1	0	3	0	3	1	0	0	0
xx	1980	2	1	1	2		3	5	5	6	6	5	4	6	7	2	6	5	6		6	5	7	7	6	4	6	4	6	6	6	6	6	6	6	6		1	1	0	0	0	0	0	0	0	0	0	0
xx	1992	2	4	2	1		2	3	4	4	7	5	2	4	6	2	5	6	4		7	6	7	7	6	7	5	5	5	5	6	6	7	7	7	5		3	3	3	0	0	0	0	1	3	0	1	1
xx	1994	2	4	2	1		2	5	3	5	6	5	2	5	7	4	5	5	6		7	5	6	4	4	7	5	4	5	5	6	5	5	5	5	6		1	1	0	1	1	3	3	1	3	1	1	1
xx	1994	2	2	2	1		1	4	4	7	7	6	2	6	3	4	2	6	6		4	7	7	4	6	7	6	4	6	6	6	4	5	5	7	7		1	3	3	3	0	3	1	0	0	0	0	0
xx	1991	1	4	2	1		2	5	4	5	6	5	2	5	6	2	6	6	5		7	6	6	5	6	6	5	6	6	6	5	5	6	7	7	6		3	1	5	0	0	0	0	1	0	0	0	0
xx	1992	1	4	2	1		1	5	4	7	4	6	1	6	5	3	4	5	6		5	5	4	5	5	5	6	5	6	5	6	4	6	7	6	6		2	1	5	0	0	1	0	0	0	0	0	0
xx	1972	2	1	1	2		2	4	4	5	6	5	2	6	6	2	4	5	6		5	5	7	6	6	6	6	6	5	6	6	4	6	4	4	4		1	5	3	1	0	0	0	5	1	0	1	0
xx	1976	2	1	1	2		1	5	5	6	4	5	1	6	6	6	7	7	6		5	7	7	7	7	7	4	3	7	7	7	7	2	7	7	1		1	5	5	3	5	0	0	1	0	0	5	5
xx	1982	2	4	2	1		1	3	3	5	4	6	2	5	4	3	6	5	6		5	6	6	5	5	6	6	6	7	7	6	5	6	6	6	6		3	0	0	0	0	1	0	0	0	0	0	0
xx	1982	2	4	2	2		2	2	2	5	6	5	4	4	6	2	5	5	5		6	6	5	5	5	6	6	5	5	5	4	4	5	5	4	4		1	1	0	0	0	0	0	0	0	0	0	0
xx	1993	2	4	2	1		2	2	2	4	6	3	4	5	6	3	6	5	7		6	4	7	5	5	6	5	5	5	5	5	4	5	6	6	6		3	3	3	0	0	0	0	0	0	0	0	0
xx	1975	1	1	1	2		1	4	4	5	4	7	4	6	4	2	6	7	6		6	5	5	7	4	5	5	4	6	6	6	4	6	6	5	6		1	3	0	0	0	1	0	3	0	0	0	0
xx	1991	1	3	2	1		2	3	3	5	6	6	3	5	5	2	6	5	5		5	5	5	4	7	6	6	4	5	5	5	5	4	6	6	6		3	3	5	5	0	3	0	1	0	0	1	1
xx	1980	2	3	1	1		1	4	5	4	6	4	2	6	6	2	6	6	6		5	5	6	6	6	6	5	5	6	6	6	5	6	6	5	6		2	3	1	1	1	0	0	0	0	0	0	0
xx	1989	2	3	2	1		1	3	2	5	6	4	4	6	6	3	5	5	6		5	6	6	6	7	7	5	4	5	5	5	5	6	6	6	6		1	5	3	1	1	1	0	1	1	0	1	0
xx	1993	2	3	2	1		2	3	3	5	6	3	2	5	6	3	6	5	7		6	6	5	6	7	7	5	5	6	5	6	5	7	6	6	7		2	3	5	1	0	3	0	1		1	0	0
xx	1993	2	4	2	1		2	4	2	5	6	4	3	6	6	2	5	5	6		6	5	7	6	6	7	6	4	6	6	7	5	7	6	5	7		3	3	5	0	0	3	0	0	0	0	0	0
xx	1976	1	1	1	2		2	2	3	6	2	6	3	6	6	2	6	5	6		6	6	5	6	6	6	4	3	3	6	5	4	5	5	7	5		1	0	0	0	0	0	0	0	0	0	0	0
xx	1966	2	1	1	2		1	2	2	5	6	5	1	6	6	6	5	5	5		7	5	6	7	7	6	5	5	7	6	6	6	5	5	5	6		1	3	3	0	0	3	0	3	1	1	0	0
xx	1975	2	1	1	1		1	4	4	6	6	5	2	7	4	4	6	6	6		7	7	7	7	7	7	6	5	6	7	6	4	6	6	7	4		3	3	3	3	1	3	1	3	1	1	1	0
xx	1981	2	4	1	2		2	6	5	6	6	6	2	7	6	2	4	6	7		6	6	7	7	1	7	6	6	6	7	6	7	6	6	6	6		1	0	0	0	1	1	1	1	1	1	0	1
xx	1981	2	1	1	2		1	3	3	6	6	4	2	6	5	2	3	6	6		5	4	6	5	7	6	6	4	6	6	7	7	7	7	5	6		1	3	3	3	0	5	0	1	1	0	0	0
xx	1990	2	4	2	1		1	3	3	5	6	4	2	6	5	2	4	5	7		5	5	7	5	5	7	6	5	5	6	5	6	6	6	6	6		2	3	3	0	0	0	0	3	1	0	1	0
xx	1991	2	4	2	1		2	1	1	5	7	5	3	4	6	3	3	5	6		4	5	7	1	1	7	6	4	5	4	4	4	7	5	5	6		3	5	3	3	5	5	3	1	0	0	0	0
xx	1991	2	3	2	1		2	2	2	5	6	6	1	4	4	3	4	6	6		6	6	6	7	7	7	7	5	7	6	6	4	5	7	6	5		1	5	3	1	1	3	0	1	3	0	0	0
xx	1993	2	4	2	1		1	2	2	4	6	5	3	6	4	3	6	5	6		7	5	7	5	5	7	6	4	6	6	6	5	5	5	5	6		3	3	3	1	1	0	0	3	0	0	0	0
xx	1993	2	4	2	1		2	3	2	5	5	5	2	5	5	2	5	6	6		6	6	7	7	7	7	6	6	5	6	7	6	7	7	7	5		1	1	0	0	0	1	0	0	0	0	0	0
xx	1993	2	4	2	1		1	3	3	5	6	5	3	6	5	3	5	6	6		6	6	4	4	4	6	6	6	6	6	6	6	6	7	7	7		1	3	5	1	0	0	0	0	0	0	0	0
xx	1994	2	2	2	1		2	2	2	5	6	5	3	6	5	2	3	6	6		7	7	6	4	6	6	5	5	6	6	5	4	7	7	6	6		1	1	3	1	0	1	0	0	1	0	0	0
xx	1980	2	1	1	2		1	4	2	5	6	6	2	6	6	6	5	7	6		7	6	7	7	7	6	6	5	7	7	5	4	7	5	5	6		1	3	3	1	1	3	1	3	1	0	0	0
xx	1982	2	2	2	1		1	2	3	6	5	6	2	6	5	5	4	6	7		6	4	4	7	7	6	5	5	4	7	7	6	6	6	5	7		2	1	5	1	0	0	0	0	0	0	0	0
xx	1994	2	4	2	1		2	3	3	7	6	5	1	6	6	3	5	3	6		7	6	7	1	1	7	6	4	6	6	6	4	6	6	6	7		1	5	3	1	0	0	0	0	0	0	0	0
xx	1976	2	1	1	2		1	2	3	6	6	3	1	6	6	3	5	5	6		7	6	7	7	7	7	6	6	7	6	6	6	6	6	6	6		1	1	1	1	0	1	0	1	0	1	1	0
xx	1981	2	4	2	2		3	2	2	4	6	5	2	6	6	2	5	6	6		6	6	7	6	6	7	6	6	6	6	6	6	6	6	6	6		1	1	1	0	1	0	1	1	1	3	1	1
xx	1985	2	4	2	1		1	2	2	5	6	6	6	7	7	2	3	6	6		5	3	5	6	6	7	6	5	6	5	5	4	6	5	4	6		2	3	0	3	1	0	1	0	1	0	1	3
xx	1994	2	3	2	1		1	2	3	7	5	4	1	5	5	3	6	6	5		6	6	5	6	7	7	5	4	5	6	6	4	6	7	7	5		1	3	5	0	0	1	0	1	0	0	0	0
xx	1993	1	4	2	1		1	2	2	6	6	6	2	6	5	6	7	5	6		6	6	7	6	6	5	5	5	5	6	5	4	6	5	6	7		1	0	0	0	0	0	0	0	0	0	0	0
xx	1982	2	2	1	2		1	5	2	7	5	6	2	7	6	6	6	6	7		6	6	6	7	5	7	5	5	6	7	6	6	6	6	5	6		1	5	3	1	0	1	0	1	0	0	0	0
xx	1986	2	3	2	2		2	2	3	6	6	6	2	5	5	2	5	6	6		7	7	7	6	6	6	5	4	6	5	5	5	6	6	6	6		1	0	0	0	0	0	0	0	0	0	0	0
xx	1992	2	4	2	1		2	3	3	5	6	4	1	6	6	2	6	6	6		4	6	7	4	4	7	7	7	7	7	7	5	7	7	7	7		3	3	5	5	0	1	0	5	0	0	1	5
xx	1993	2	4	2	1		1	3	3	7	6	5	3	6	6	2	5	5	6		6	6	7	6	7	7	7	6	7	6	6	6	7	7	6	7		1	0	5	0	0	0	0	0	0	0	0	0
xx	1994	2	2	2	1		1	2	2	6	6	5	2	6	5	3	4	6	6		6	6	7	7	7	7	6	3	6	6	7	6	7	5	7	7		1	3	3	1	0	0	0	0	0	0	0	0
xx	1994	2	4	2	1		1	3	3	7	7	6	4	6	5	4	6	6	6		6	6	7	1	1	7	6	1	6	7	6	3	6	6	7	6		1	1	3	3	1	1	1	3	1	3	5	1
xx	1993	1	2	2	1		1	3	3	6	6	6	2	5	6	2	5	6	6		7	6	7	7	7	7	6	4	6	6	6	6	6	7	5	6		3	3	5	3	0	1	0	0	0	0	0	0
xx	1975	2	2	1	2		1	3	3	6	6	5	2	6	6	2	5	6	6		6	5	6	6	5	6	5	4	5	6	5	5	5	6	4	6		1	5	3	0	3	0	0	1	5	0	0	0
xx	1977	2	2	1	2		1	2	2	5	6	5	2	6	5	2	4	6	7		5	4	5	6	5	6	5	5	5	5	5	4	4	5	4	4		1	3	0	0	0	1	0	1	0	0	0	0
xx	1984	2	2	1	1		1	4	3	6	6	5	1	6	6	2	5	6	6		6	6	6	7	6	6	6	5	6	6	6	4	6	6	6	6		3	3	3	1	1	1	1	3	1	0	1	0
xx	1993	2	4	2	1		2	2	1	5	5	5	3	7	7	3	4	6	7		6	5	6	5	7	7	4	4	4	5	5	7	6	6	4	5		3	5	1	3	1	3	0	3	3	1	0	0
xx	1993	2	2	2	1		1	2	3	6	7	6	3	6	7	3	5	5	5		6	4	6	6	6	5	5	5	6	5	5	5	4	6	5	5		2	3	3	1	0	0	0	0	0	0	0	0
xx	1994	2	3	2	1		1	3	4	7	3	6	1	7	7	2	5	5	6		7	6	7	7	7	7	5	4	6	6	7	4	7	6	7	6		1	3	0	1	0	0	0	0	0	0	1	0
xx	1971	2	2	1	2		1	3	3	5	5	6	2	6	6	2	6	6	7		6	5	6	5	7	6	5	4	6	5	5	5	5	4	5	5		1	3	3	1	0	3	0	1	0	0	1	3
xx	1993	2	4	2	1		3	3	4	6	6	6	2	7	6	1	6	6	6		7	7	7	6	6	6	6	5	6	6	6	6	7	6	7	7		3	3	3	1	0	0	0	3	0	0	0	0
xx	1966	2	1	1	2		1	3	3	6	6	6	2	6	6	2	6	6	6		7	6	7	7	7	7	6	6	6	6	7	5	6	6	6	6		1	3	3	1	0	1	0	3	1	1	1	1
xx	1973	2	1	1	2		1	3	3	6	7	6	2	7	7	2	5	4	6		4	4	6	7	7	7	5	4	7	5	4	4	5	5	3	4		1	5	1	1	0	3	0	3	1	0	1	0
xx	1993	2	3	2	1		1	4	3	6	7	6	1	5	5	2	5	7	7		6	7	7	1	7	7	4	2	6	5	6	6	6	7	6	6		1	1	1	1	1	1	1	1	1	1	1	1
xx	1993	2	3	2	1		1	3	3	6	7	6	2	7	6	3	6	5	6		7	6	7	6	7	7	6	4	6	7	6	7	6	6	6	7		1	3	0	1	0	1	0	1	1	0	1	0
xx	1991	1	2	2	1		2	4	2	6	7	6	1	6	6	2	6	6	6		7	6	7	1	7	7	6	6	6	6	6	5	6	6	6	6		3	3	1	1	1	0	0	1	1	1	1	1
xx	1981	2	4	2	2		3	3	2	5	7	6	3	7	7	2	6	7	6		6	6	6	6	6	7	6	5	5	5	5	5	7	7	7	6		1	3	5	5	0	0	0	0	0	0	0	0
xx	1986	2	4	1	2		1	2	1	6	6	6	3	6	5	1	5	6	6		4	7	7	7	6	6	7	7	5	6	7	7	7	7	6	7		2	1	1	5	1	1	1	1	5	1	5	5
xx	1991	2	3	2	1		1	2	2	5	7	5	2	6	7	3	5	7	6		7	5	7	4	7	6	5	4	6	5	7	6	5	7	7	6		2	3	0	1	0	0	0	0	0	0	0	0
xx	1993	2	4	2	1		1	2	2	5	6	4	2	7	7	2	6	6	6		6	5	7	1	1	6	6	1	6	6	6	1	6	6	6	7		1	1	5	0	0	1	0	0	0	0	0	3
xx	1989	2	1	1	1		1	3	3	7	7	6	1	7	7	4	3	7	7		7	4	7	7	7	6	6	6	7	6	7	7	7	7	5	4		2	5	3	0	1	3	1	5	0	0	0	0
xx	1989	1	2	2	1		2	3	2	6	7	6	2	6	7	1	6	6	7		7	5	5	5	6	6	5	5	5	6	4	4	5	5	6	6		2	3	0	0	0	0	0	0	0	0	0	0
xx	1974	2	1	1	2		1	2	2	5	6	6	1	6	7	2	6	7	6		5	4	5	7	7	6	7	6	7	7	6	4	4	5	4	4		1	3	1	1	0	1	0	5	0	0	3	0
xx	1991	2	4	2	1		1	1	3	5	7	6	3	7	7	1	6	6	6		6	5	7	6	6	7	5	4	5	5	6	6	6	6	7	7		1	1	3	0	0	0	0	0	0	0	0	0
xx	1993	2	4	2	1		1	4	3	7	7	6	1	7	6	1	6	7	6		7	7	7	6	7	7	7	7	6	7	6	7	7	7	7	7		1	1	5	0	0	1	0	0	0	0	0	0
xx	1964	2	1	1	1		1	3	2	7	6	6	1	6	7	1	6	6	7		7	7	6	7	6	7	6	5	7	6	7	6	6	7	6	7		2	5	0	0	0	3	0	1	0	0	0	0
xx	1992	2	4	2	1		1	2	2	6	7	5	1	7	7	2	6	7	6		7	7	7	7	7	7	6	7	7	6	7	5	7	7	7	7		2	5	5	3	3	1	1	3	1	1	0	1
xx	1992	2	3	2	1		1	2	2	6	7	6	2	7	7	2	6	7	7		6	6	7	4	7	7	6	5	7	6	6	4	7	6	7	6		3	3	1	3	0	0	0	0	0	0	0	0
xx	1994	2	3	2	1		1	1	1	7	7	5	1	7	7	2	6	7	7		6	5	7	6	7	7	7	5	7	7	7	6	7	7	6	6		1	0	5	0	0	0	0	0	0	0	0	0
[truncated: 9 more columns]
